# Supplementary material for: Na6Sn3P4S16: Sn(ii)-chelated PS4 groups inspired an ultra-strong SHG response
Source: Royal Society of Chemistry journal article supplement (doi:10.1039/d3qi01257c), 2023-01-01
Supplement: d3qi01257c1.pdf [file d3qi01257c1.pdf]

**Na<sub>6</sub>Sn<sub>3</sub>P<sub>4</sub>S<sub>16</sub>: Sn(II)-Chelated PS<sub>4</sub> groups inspired Ultra-strong SHG Response**

Chenyao Zhao,<sup>a</sup> Bingbing Zhang,<sup>a,\*</sup> Xinyu Tian,<sup>a</sup> Guoqiang Zhou<sup>a,\*</sup>, Jingjing Xu,<sup>a</sup> Kui Wu<sup>b,\*</sup>

<sup>a</sup>College of Chemistry and Materials Science, Hebei University, Baoding, China

<sup>b</sup>State Key Laboratory of Crystal Materials and Institute of Crystal Materials, Shandong University, Jinan, China

*To whom correspondence should be addressed :*

*E-mail: wukui@sdu.edu.cn (Kui Wu); zhougq1982@163.com (Guoqiang Zhou);*

*zhangbb@hbu.edu.cn (Bingbing Zhang)*

## **CONTENTS**

1. Tables
2. Figures
3. References

## 1. Tables

**Table S1.** Property comparison of the reported IR NLO thiophosphates with bandgaps ( $> 2.50$  eV).

**Table S2.** Crystal data and structure refinement for  $\text{Na}_6\text{Sn}_3\text{P}_4\text{S}_{16}$ .

**Table S3.** The coordination modes of Sn(II) in the known chalcogenide compounds.

**Table S4.** Dipole moment calculation for  $\text{Na}_6\text{Sn}_3\text{P}_4\text{S}_{16}$ .

**Table S1.** Property comparison of the reported IR NLO thiophosphates with bandgaps ( $> 2.50$  eV).

| No. | Compounds                                       | $d_{ij}(\times\text{AGS})$ | $E_g(\text{eV})$ | Ref.      |
|-----|-------------------------------------------------|----------------------------|------------------|-----------|
| 1   | $\text{Na}_6\text{Sn}_3\text{P}_4\text{S}_{16}$ | 6.6                        | 2.52             | this work |
| 2   | $\text{AgHgPS}_4$                               | 5                          | 2.63             | [1]       |
| 3   | $\text{KHgPS}_4$                                | 4.15                       | 2.9              | [2]       |
| 4   | $\text{Hg}_3\text{P}_2\text{S}_8$               | 3.6                        | 2.77             | [3]       |
| 5   | $\text{NaHgPS}_4$                               | 3.14                       | 2.78             | [2]       |
| 6   | $\text{CuZnPS}_4$                               | 3                          | 3                | [4]       |
| 7   | $\text{Zn}_3\text{P}_2\text{S}_8$               | 2.6                        | 3.12             | [5]       |
| 8   | $\text{KSbP}_2\text{S}_6$                       | 2.2                        | 2.91             | [6]       |
| 9   | $\text{K}_2\text{BaP}_2\text{S}_6$              | 2.1                        | 4.11             | [6]       |
| 10  | $\text{AgZnPS}_4$                               | 1.8                        | 2.76             | [7]       |
| 11  | $\alpha\text{-Ba}_2\text{P}_2\text{S}_6$        | 1.7                        | 4.31             | [8]       |
| 12  | $\text{K}_3\text{YP}_2\text{S}_8$               | 1.4                        | 3.37             | [9]       |
| 13  | $\text{Pb}_2\text{P}_2\text{S}_6$               | 1.4                        | 2.61             | [8]       |
| 14  | $\text{KAg}_2\text{PS}_4$                       | 1.4                        | 2.92             | [10]      |
| 15  | $\text{AgGa}_2\text{PS}_6$                      | 1                          | 2.75             | [11]      |

|    |                                                                |      |      |      |
|----|----------------------------------------------------------------|------|------|------|
| 16 | Eu <sub>2</sub> P <sub>2</sub> S <sub>6</sub>                  | 0.9  | 2.54 | [12] |
| 17 | LiZnPS <sub>4</sub>                                            | 0.8  | 3.38 | [7]  |
| 18 | LiCd <sub>3</sub> PS <sub>6</sub>                              | 0.8  | 2.97 | [13] |
| 19 | α-Ag <sub>4</sub> P <sub>2</sub> S <sub>6</sub>                | 0.61 | 2.51 | [14] |
| 20 | LiGa <sub>2</sub> PS <sub>6</sub>                              | 0.5  | 3.15 | [13] |
| 21 | AgCd <sub>3</sub> (PS <sub>4</sub> )S <sub>2</sub>             | 0.45 | 2.56 | [15] |
| 22 | Rb <sub>2</sub> Zn <sub>3</sub> P <sub>4</sub> S <sub>13</sub> | 0.1  | 3.31 | [16] |
| 23 | Cs <sub>2</sub> Zn <sub>3</sub> P <sub>4</sub> S <sub>13</sub> | 0.1  | 3.29 | [16] |

**Table S2.** Crystal data and structure refinement for Na<sub>6</sub>Sn<sub>3</sub>P<sub>4</sub>S<sub>16</sub>.

|                                                                                          |                                                                |
|------------------------------------------------------------------------------------------|----------------------------------------------------------------|
| Empirical formula                                                                        | Na <sub>6</sub> Sn <sub>3</sub> P <sub>4</sub> S <sub>16</sub> |
| formula weight                                                                           | 1130.85                                                        |
| crystal system                                                                           | trigonal                                                       |
| space group                                                                              | <i>R</i> 3 <i>m</i>                                            |
| cell parameter <i>a</i> (Å)                                                              | 19.304(4)                                                      |
| cell parameter <i>c</i> (Å)                                                              | 6.181(2)                                                       |
| Z, <i>V</i> (Å <sup>3</sup> ) (Volume)                                                   | 3, 1994.6(11)                                                  |
| D <sub>c</sub> (g/cm <sup>3</sup> ) (calculated density)                                 | 2.824                                                          |
| μ (mm <sup>-1</sup> ) (absorption coefficient)                                           | 4.388                                                          |
| goodness-of-fit on F <sup>2</sup>                                                        | 0.998                                                          |
| <i>R</i> <sub>1</sub> , <i>wR</i> <sub>2</sub> ( <i>I</i> > 2σ( <i>I</i> )) <sup>a</sup> | 0.0427, 0.0629,                                                |
| <i>R</i> <sub>1</sub> , <i>wR</i> <sub>2</sub> (all data)                                | 0.0724, 0.0783                                                 |
| absolute structure parameter                                                             | -0.03(6)                                                       |

$$^{[a]}R_1 = F_o - F_c / F_o \text{ and } wR_2 = [w (F_o^2 - F_c^2)^2 / wF_o^4]^{1/2} \text{ for } F_o^2 > 2\sigma (F_o^2)$$

**Table S3.** The coordination modes of Sn(II) in the known chalcogenide compounds.

| Compounds                                         | Space group                       | Link modes       |
|---------------------------------------------------|-----------------------------------|------------------|
| Sn <sub>2</sub> Ga <sub>2</sub> S <sub>5</sub>    | <i>Pna2</i> <sub>1</sub>          | SnS <sub>4</sub> |
| SnGa <sub>4</sub> S <sub>7</sub>                  | <i>Pc</i>                         | SnS <sub>4</sub> |
| BaSnS <sub>2</sub>                                | <i>P</i> -1                       | SnS <sub>3</sub> |
| BaSn <sub>2</sub> S <sub>3</sub>                  | <i>P</i> -1                       | SnS <sub>3</sub> |
| Ag <sub>4</sub> SnGe <sub>2</sub> S <sub>7</sub>  | <i>Cc</i>                         | SnS <sub>3</sub> |
| Ag <sub>7</sub> Sn(PS <sub>4</sub> ) <sub>3</sub> | <i>P2</i> <sub>1</sub> / <i>c</i> | SnS <sub>3</sub> |
| KSnPS <sub>4</sub>                                | <i>P2</i> <sub>1</sub> / <i>c</i> | SnS <sub>3</sub> |
| CsSnPS <sub>4</sub>                               | <i>P2</i> <sub>1</sub> / <i>m</i> | SnS <sub>3</sub> |
| SnGa <sub>2</sub> GeS <sub>6</sub>                | <i>Fdd2</i>                       | SnS <sub>5</sub> |
| LaSnGa <sub>3</sub> S <sub>7</sub>                | <i>P2</i> <sub>1</sub> / <i>n</i> | SnS <sub>5</sub> |
| Sn <sub>2</sub> SiS <sub>4</sub>                  | <i>P21</i> / <i>c</i>             | SnS <sub>6</sub> |
| SnPS <sub>3</sub>                                 | <i>Pn</i>                         | SnS <sub>8</sub> |

**Table S4.** Dipole moment calculation for Na<sub>6</sub>Sn<sub>3</sub>P<sub>4</sub>S<sub>16</sub>.

| Species            | Dipole Moment |        |         | Magnitude                                                      |                                         |
|--------------------|---------------|--------|---------|----------------------------------------------------------------|-----------------------------------------|
|                    | x(a)          | y(b)   | z(c)    | Debye                                                          | ×10 <sup>-4</sup> esu·cm/Å <sup>3</sup> |
|                    |               |        |         | Na <sub>6</sub> Sn <sub>3</sub> P <sub>4</sub> S <sub>16</sub> |                                         |
| NaS <sub>6</sub>   | -1.89         | 1.88   | 11.48   | 11.79                                                          | 0.02                                    |
| SnS <sub>4</sub>   | -38.03        | 38.03  | -123.76 | 134.94                                                         | 0.20                                    |
| P(1)S <sub>4</sub> | 38.51         | -38.11 | -5.38   | 54.45                                                          | 0.08                                    |
| P(2)S <sub>4</sub> | 57.26         | -57.26 | 19.05   | 83.19                                                          | 0.13                                    |
| Unit Cell          | 55.85         | -55.46 | -98.61  | 284.37                                                         | 0.43                                    |

## 2. Figures

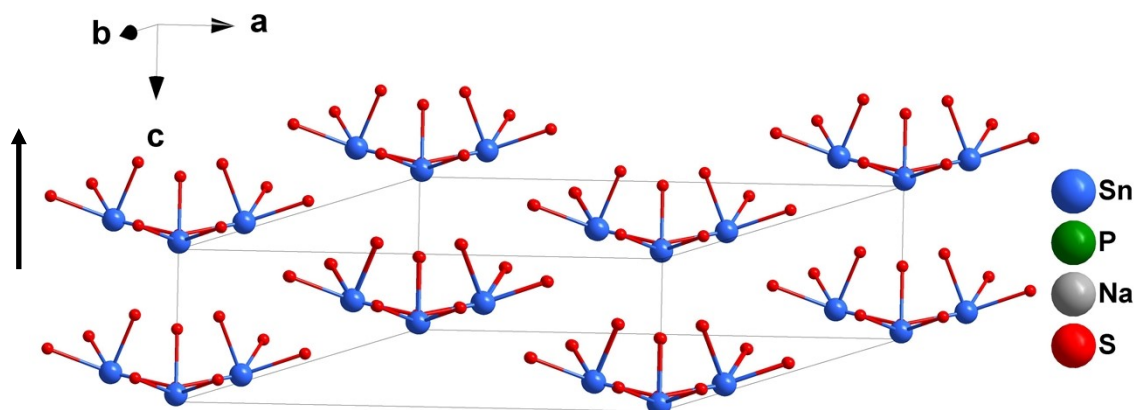

**Figure S1.** The overall stacking arrangement of  $\text{SnS}_4$  units in the unit cell in  $\text{Na}_6\text{Sn}_3\text{P}_4\text{S}_{16}$ .

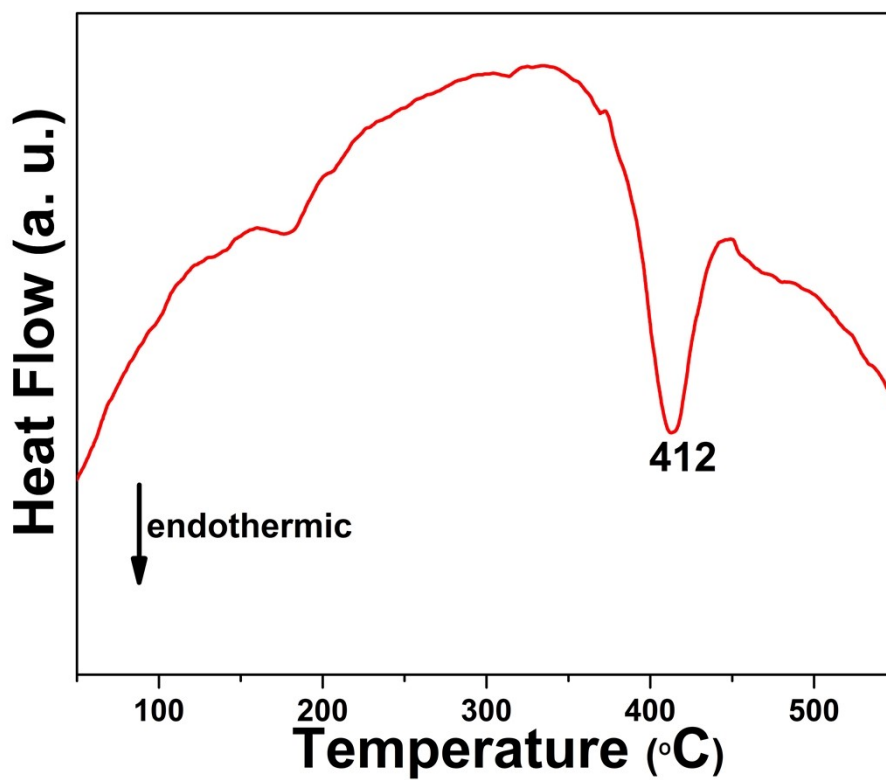

**Figure S2.** DSC curve of  $\text{Na}_6\text{Sn}_3\text{P}_4\text{S}_{16}$ .

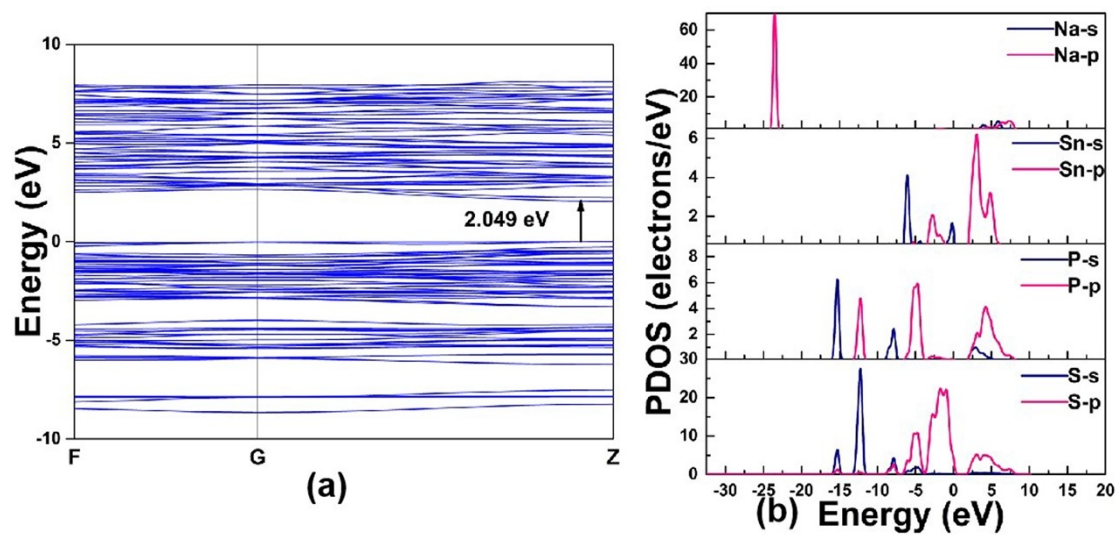

Figure S3. Band structure and DOS diagram of  $\text{Na}_6\text{Sn}_3\text{P}_4\text{S}_{16}$ .

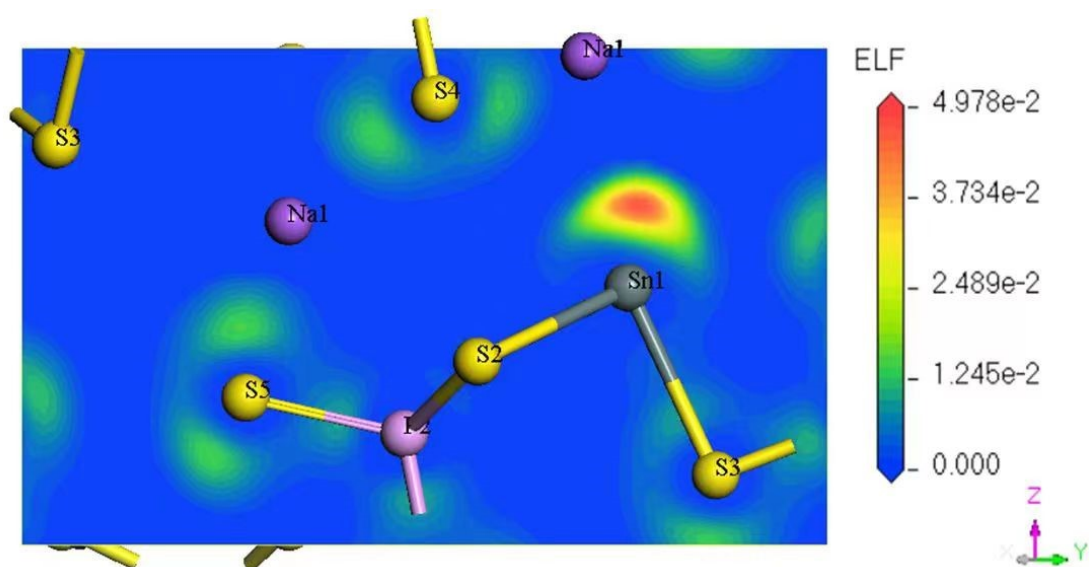

Figure S4. ELF map of  $\text{Na}_6\text{Sn}_3\text{P}_4\text{S}_{16}$ .

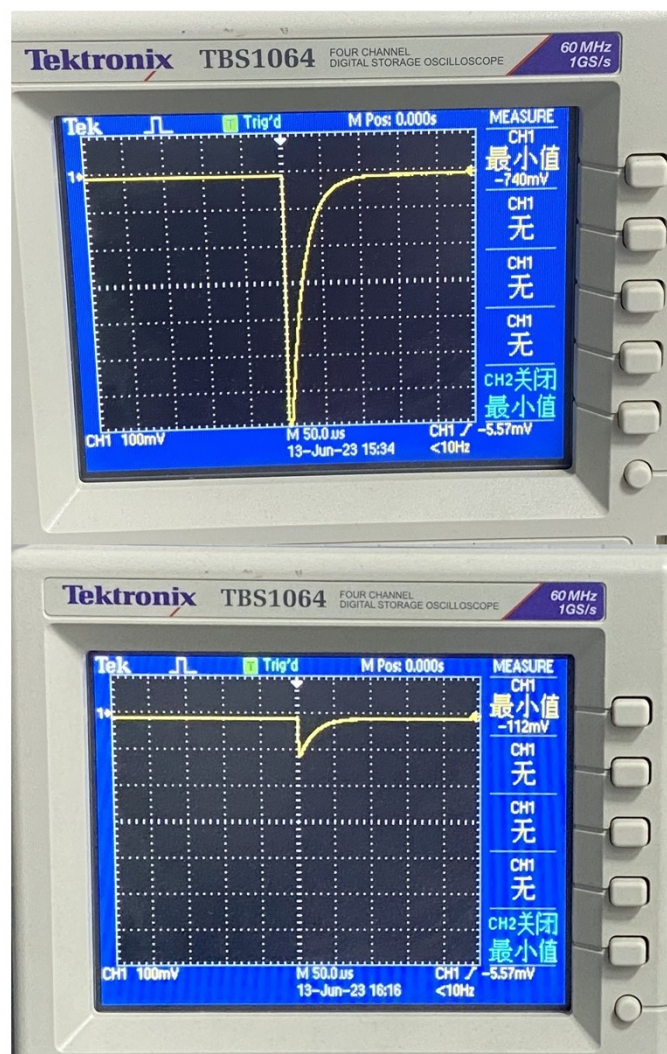

**Figure S5.** Experimental SHG intensity of the  $\text{Na}_6\text{Sn}_3\text{P}_4\text{S}_{16}$  and the standard  $\text{AgGaS}_2$  at the particle size (200-250  $\mu\text{m}$ ).



### 3. References

- [1] W. Xing, N. Wang, C. Tang, C. Li, Z. Lin, J. Yao, W. Yin and B. Kang, From AgGaS<sub>2</sub> to AgHgPS<sub>4</sub>: vacancy defects and highly distorted HgS<sub>4</sub> tetrahedra double-induced remarkable second-harmonic generation response, *J. Mater. Chem. C*, 2021, **9**, 1062-1068.
- [2] W. Xing, C. Tang, P. Gong, J. Wu, Z. Lin, J. Yao, W. Yin and B. Kang, Investigation into Structural Variation from 3D to 1D and Strong Second Harmonic Generation of the AHgPS<sub>4</sub> (A<sup>+</sup> = Na<sup>+</sup>, K<sup>+</sup>, Rb<sup>+</sup>, Cs<sup>+</sup>) Family, *Inorg. Chem.*, 2021, **60**, 18370-18378.
- [3] Y. Chu, P. Wang, H. Zeng, S. Cheng, X. Su, Z. Yang, J. Li and S. Pan, Hg<sub>3</sub>P<sub>2</sub>S<sub>8</sub>: A New Promising Infrared Nonlinear Optical Material with a Large Second-Harmonic Generation and a High Laser-Induced Damage Threshold, *Chem. Mater.*, 2021, **33**, 6514-6521.
- [4] Z. Li, S. Zhang, Z. Huang, L.-D. Zhao, E. Uykur, W. Xing, Z. Lin, J. Yao and Y. Wu, Molecular Construction from AgGaS<sub>2</sub> to CuZnPS<sub>4</sub>: Defect-Induced Second Harmonic Generation Enhancement and Cosubstitution-Driven Band Gap Enlargement, *Chem. Mater.*, 2020, **32**, 3288-3296.
- [5] Z. Li, X. Jiang, M. Zhou, Y. Guo, X. Luo, Y. Wu, Z. Lin and J. Yao, Zn<sub>3</sub>P<sub>2</sub>S<sub>8</sub>: A Promising Infrared Nonlinear-Optical Material with Excellent Overall Properties, *Inorg. Chem.*, 2018, **57**, 10503-10506.
- [6] V. Nguyen, B. Ji, K. Wu, B. Zhang and J. Wang, Unprecedented mid-infrared nonlinear optical materials achieved by crystal structure engineering, a case study of KXP<sub>2</sub>S<sub>6</sub> (X = Sb, Bi, Ba), *Chem. Sci.*, 2022, **13**, 2640-2648.
- [7] M. Zhou, L. Kang, J. Yao, Z. Lin, Y. Wu and C. Chen, Nonlinear Optical Thiophosphates from LiZnPS<sub>4</sub> to AgZnPS<sub>4</sub>: A Combined Experimental and Theoretical Study, *Inorg. Chem.*, 2016, **55**, 3724-3726.
- [8] B. Ji, A. Sarkar, K. Wu, A. Swindle and J. Wang, A<sub>2</sub>P<sub>2</sub>S<sub>6</sub> (A = Ba and Pb): a good platform to study the polymorph effect and lone pair effect to form an acentric structure, *Dalton Trans.*, 2022, **51**, 4522-4531.
- [9] X. Tian, Y. Xiao, B. Zhang, D. Yang and K. Wu, Novel structural transformation in K<sub>3</sub>ReP<sub>2</sub>S<sub>8</sub> thiophosphates originating from the rare-earth (Re) cation sizes induced local coordination asymmetry, *Mater. Today Phys.*, 2022, **28**, 100885.
- [10] W. Zhou, B. Li, W. Liu and S.-P. Guo, AAg<sub>2</sub>PS<sub>4</sub> (A = K, Na/K): the first-type of noncentrosymmetric alkali metal Ag-based thiophosphates exhibiting excellent second-order nonlinear optical performances, *Inorg. Chem. Front.*, 2022, **9**, 4990-4998.
- [11] J. H. Feng, C. L. Hu, X. Xu, B. X. Li, M. J. Zhang and J. G. Mao, AgGa<sub>2</sub>PS<sub>6</sub>: A New Mid-Infrared Nonlinear Optical Material with a High Laser Damage Threshold and a Large Second Harmonic Generation Response, *Chem. Eur. J.*, 2017, **23**, 10978-10982.
- [12] X. Huang, S. H. Yang, X. H. Li, W. Liu and S. P. Guo, Eu<sub>2</sub>P<sub>2</sub>S<sub>6</sub>: The First Rare-Earth Chalcogenophosphate Exhibiting Large Second-Harmonic Generation Response and High Laser-Induced Damage Threshold, *Angew. Chem. Int. Ed.*, 2022, **61**, e202206791.
- [13] J. Feng, C.-L. Hu, B. Li and J.-G. Mao, LiGa<sub>2</sub>PS<sub>6</sub> and LiCd<sub>3</sub>PS<sub>6</sub>: Molecular Designs of Two New Mid-Infrared Nonlinear Optical Materials, *Chem. Mater.*, 2018, **30**, 3901-3908.
- [14] C. Crokek, B. Ji, A. Sarkar, F. Wang, T. H. Syed, W. Wei, S.-P. Guo and J. Wang, Revisiting two thiophosphate compounds constituting d<sup>0</sup> transition metal HfP<sub>2</sub>S<sub>6</sub> and d<sup>10</sup> transition metal α-Ag<sub>4</sub>P<sub>2</sub>S<sub>6</sub> as multifunctional materials for combining second harmonic generation response and photocurrent response, *CrystEngComm*, 2023, **25**, 1175-1185.
- [15] Y. H. Fan, X. M. Jiang, B. W. Liu, S. F. Li, W. H. Guo, H. Y. Zeng, G. C. Guo and J. S. Huang, Phase Transition and Second Harmonic Generation in Thiophosphates Ag<sub>2</sub>Cd(P<sub>2</sub>S<sub>6</sub>) and AgCd<sub>3</sub>(PS<sub>4</sub>)<sub>2</sub> Containing Two Second-Order Jahn-Teller Distorted Cations, *Inorg. Chem.*, 2017, **56**, 114-124.
- [16] M.-Z. Li, L.-T. Jiang, S.-M. Pei, B.-W. Liu, X.-M. Jiang and G.-C. Guo, A<sub>2</sub>Zn<sub>3</sub>P<sub>4</sub>S<sub>13</sub> (A = Rb and Cs): First

Infrared Nonlinear Optical Materials with Mixed Thiophosphate Functional Motifs  $\text{PS}_4$  and  $\text{P}_2\text{S}_6$ , *J. Mater. Chem. C*, 2022, **10**, 9146-9151.
